# Supplementary material for: The effect of sodium thiosulfate on the metabolism of cis-platin in human plasma in vitro
Source: Royal Society of Chemistry journal article supplement (doi:10.1039/c2mt20076g), 2012-01-01
Supplement: c2mt20076g.pdf [file c2mt20076g.pdf]

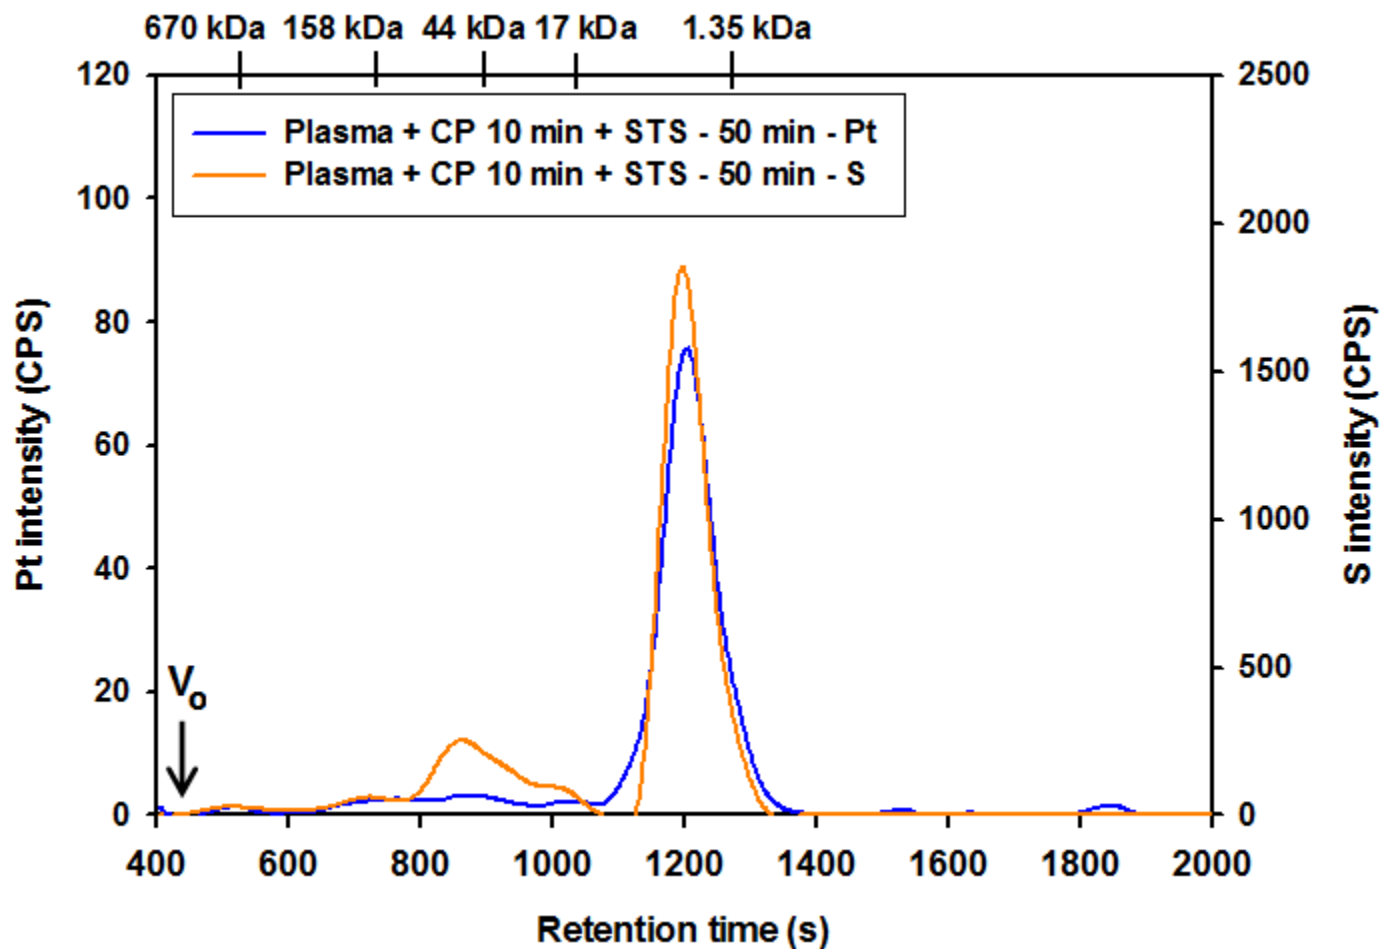

Pt and S-specific chromatograms obtained after the analysis of human plasma (2.0 mL) to which *cis*-platin (0.04 mg *cis*-platin/mL plasma) was added followed 10 min later by sodium thiosulfate (STS). 50 min after incubation (37° C) the mixture was analyzed by SEC-ICP-AES. Stationary phase: Superdex 200 10/300 GL SEC column (30 x 1.0 cm I.D., 13 µm particle size) at 22 °C; Mobile phase: PBS buffer (0.15 M, pH 7.4); Flow rate 1.0 mL/min, Injection volume: 500 µL, Detector: ICP-AES at 214.423 nm (Pt) and 180.731 nm (S). The retention times of the molecular markers are depicted on top of the figure.
